# Supplementary material for: Richly electron-deficient BCxO3−x anodes with enhanced reaction kinetics for sodium/potassium-ion batteries
Source: Royal Society of Chemistry journal article supplement (doi:10.1039/d2qm00372d), 2022-01-01
Supplement: d2qm00372d1.pdf [file d2qm00372d1.pdf]

# Supporting Information

## Richly electron-deficient $\text{BC}_x\text{O}_{3-x}$ anodes with enhanced reaction kinetics for sodium/potassium-ion batteries

Huiqi Wang,<sup>\*a</sup> Na Bai,<sup>a</sup> Mei Wang,<sup>a</sup> Liyong Wang,<sup>a</sup> Ying Li,<sup>a</sup> Jingpeng Chen,<sup>b</sup> Shengliang Hu<sup>a</sup>  
and Chenmeng Chen<sup>\*b</sup>

<sup>a</sup> *School of Energy and Power Engineering & School of Materials Science and Engineering, North University of China, Taiyuan 030051, P. R. China*

<sup>b</sup> *CAS Key Laboratory of Carbon Materials, Institute of Coal Chemistry, Chinese Academy of Sciences, Taiyuan 030001, P. R. China.*

**\*Corresponding authors.**

E-mail address: hqiwang@nuc.edu.cn (H. Wang), ccm@sxicc.ac.cn (C. M. Chen).

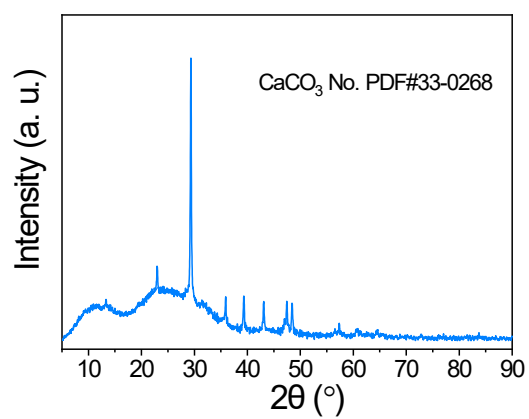

**Figure S1** XRD pattern of the PTA@CaCO<sub>3</sub> precursor after hydrothermal treatment.

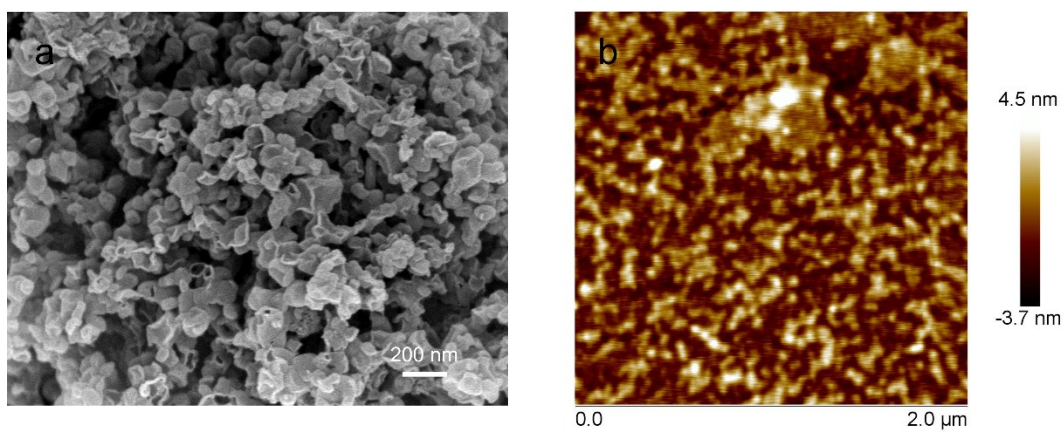

**Figure S2** (a) SEM image and (b) AFM image of the BCNCs.

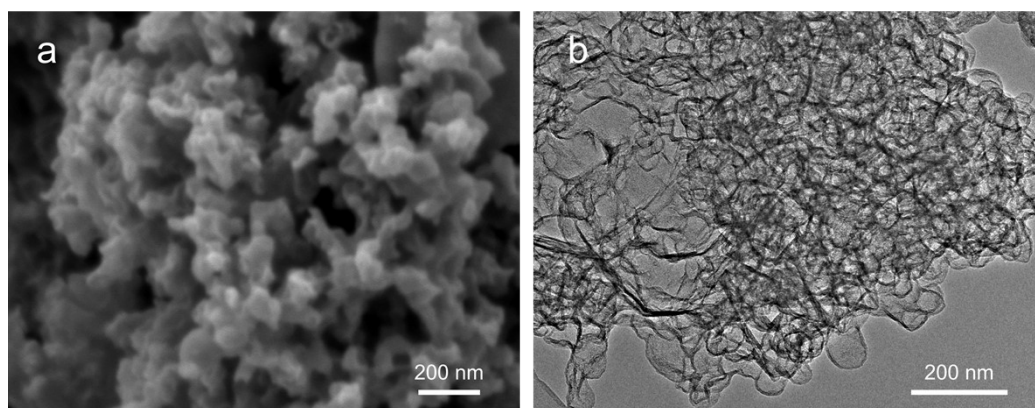

**Figure S3** (a) SEM image and (b) TEM image of the pristine CNCs.

**Table S1** Components (at. %) of various element species for both BCNCs and CNCs.

| No.   | B 1s | C 1s  | O 1s  |
|-------|------|-------|-------|
| BCNCs | 7.29 | 82.78 | 9.93  |
| CNCs  | 0    | 89.29 | 10.71 |

**Table S2** Ratios of five types of B 1s components for BCNCs and cycled BCNCs anode in SIBs/PIBs.

| No.                        | B–O     |          | BCO <sub>2</sub> |          | BC <sub>2</sub> O |          | BC <sub>3</sub> |          | B–B     |          |
|----------------------------|---------|----------|------------------|----------|-------------------|----------|-----------------|----------|---------|----------|
|                            | BE (eV) | Area (%) | BE (eV)          | Area (%) | BE (eV)           | Area (%) | BE (eV)         | Area (%) | BE (eV) | Area (%) |
| BCNCs                      | 194.5   | 7.15     | 192.9            | 43.68    | 192.1             | 34.07    | 189.2           | 5.99     | 187.3   | 9.11     |
| Cycled BCNCs anode in SIBs | 195.2   | 34.97    | 194.4            | 54.39    | 192.2             | 10.64    | -               | -        | -       | -        |
| Cycled BCNCs anode in PIBs | 195.5   | 38.96    | 194.6            | 48.19    | 193.3             | 12.84    | -               | -        | -       | -        |

**Table S3** Ratios of five types of C 1s components for BCNCs and cycled BCNCs anode in SIBs/PIBs.

| No.                        | C–C     |          | C–O     |          | C=O     |          |
|----------------------------|---------|----------|---------|----------|---------|----------|
|                            | BE (eV) | Area (%) | BE (eV) | Area (%) | BE (eV) | Area (%) |
| BCNCs                      | 284.8   | 48.65    | 285.9   | 25.09    | 290.0   | 26.26    |
| Cycled BCNCs anode in SIBs | 284.8   | 51.34    | 286.3   | 24.39    | 288.8   | 24.28    |
| Cycled BCNCs anode in PIBs | 284.7   | 47.99    | 285.9   | 33.76    | 288.0   | 18.24    |

**Table S4** Ratios of five types of O 1s components for BCNCs and cycled BCNCs anode in SIBs/PIBs.

| No.                        | O=C     |          | O–C     |          | O–B     |          |
|----------------------------|---------|----------|---------|----------|---------|----------|
|                            | BE (eV) | Area (%) | BE (eV) | Area (%) | BE (eV) | Area (%) |
| BCNCs                      | 532.1   | 59.69    | 533.3   | 33.21    | 537.5   | 7.10     |
| Cycled BCNCs anode in SIBs | 531.5   | 49.10    | 532.7   | 40.95    | 536.6   | 9.95     |
| Cycled BCNCs anode in PIBs | 531.2   | 58.50    | 532.8   | 41.50    | -       | -        |

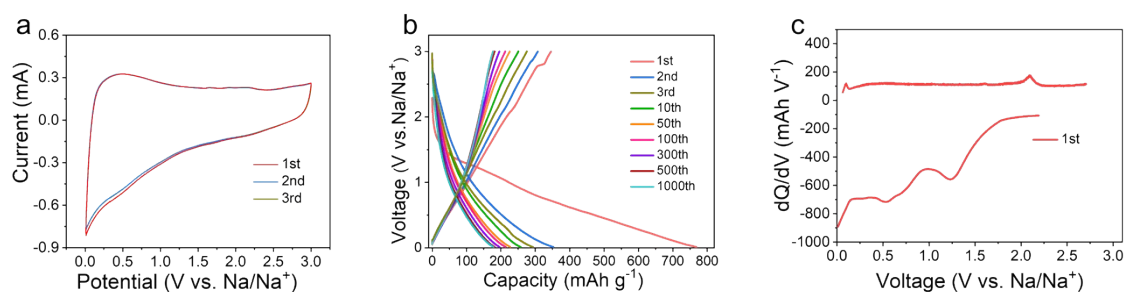

**Figure S4** (a) CV curves at  $0.1 \text{ mV s}^{-1}$  of BCNCs electrode. (b) Discharge-charge curves of BCNCs electrodes at  $0.1 \text{ A g}^{-1}$ . (c) Corresponding  $dQ/dV$  profiles of the initial cycle for BCNCs anode of SIBs.

**Table S5** Kinetic parameters calculated by fitting an equivalent circuit of three electrodes.

| Samples                             | Conductivity <sup>a</sup> |                   |            |                |                   |            |      |
|-------------------------------------|---------------------------|-------------------|------------|----------------|-------------------|------------|------|
|                                     | SIBs                      |                   |            | PIBs           |                   |            |      |
| ( $\times 10^3 \text{ S cm}^{-1}$ ) | $R_s (\Omega)$            | $R_{ct} (\Omega)$ | $\sigma^b$ | $R_s (\Omega)$ | $R_{ct} (\Omega)$ | $\sigma^b$ |      |
| CNCs                                | 2.6                       | 7.0               | 212.6      | 161.1          | 0.79              | 15.06      | 29.7 |
| BCNCs                               | 9.2                       | 4.5               | 181.9      | 160.1          | 1.06              | 8.08       | 18.2 |
| CNCs (after 1000 cycles)            | -                         | 3.1               | 177.2      | 156.6          | -                 | -          | -    |
| BCNCs (after 1000 cycles)           | -                         | 4.2               | 172.2      | 150.1          | -                 | -          | -    |

<sup>a</sup> The data were calculated by using 4-point probe method.

<sup>b</sup> The slope of the corresponding lines shown in Figure 3e and S6.

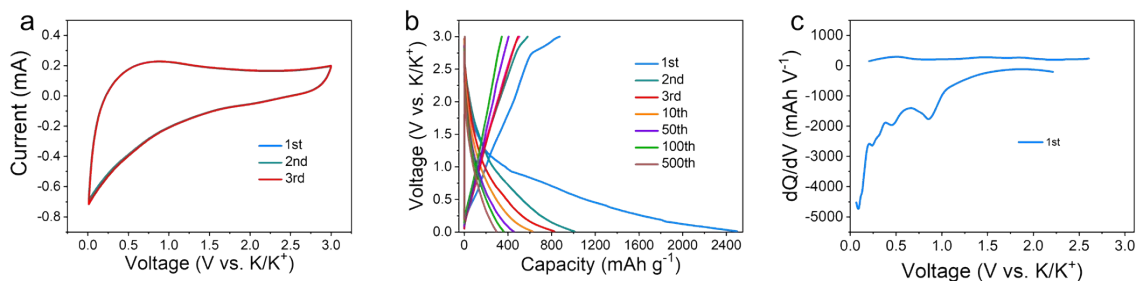

**Figure S5** (a) CV curves at  $0.1 \text{ mV s}^{-1}$  (0.01–3.0 V) of BCNCs electrode. (b) Discharge-charge curves of BCNCs electrodes at  $0.1 \text{ A g}^{-1}$ . (c) Corresponding  $dQ/dV$  profiles of the initial cycle for BCNCs anode of SIBs.

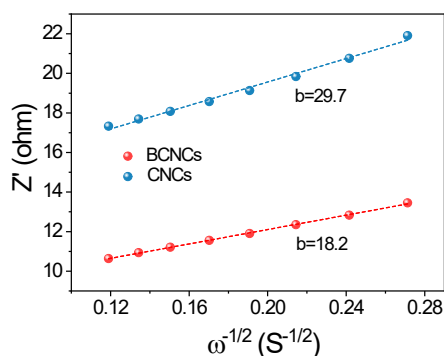

**Figure S6** The relationship between  $Z'$  and  $\omega^{-1/2}$  of CNCs and BCNCs.

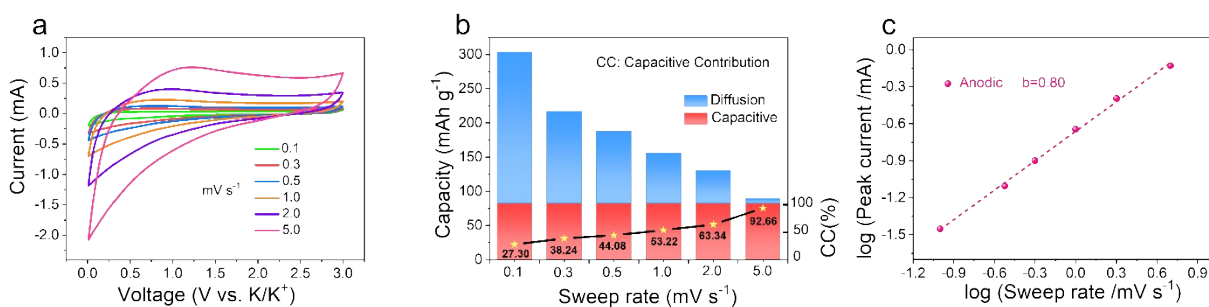

**Figure S7** Kinetic analyses for PIBs. (a) CV curves and (b) capacitive contribution under scan rates of 0.1, 0.3, 0.5, 1.0, 2.0 and 5.0  $\text{mV s}^{-1}$  and (c) The  $b$  values plotted for the potential anodic and cathodic peak of BCNCs electrodes.

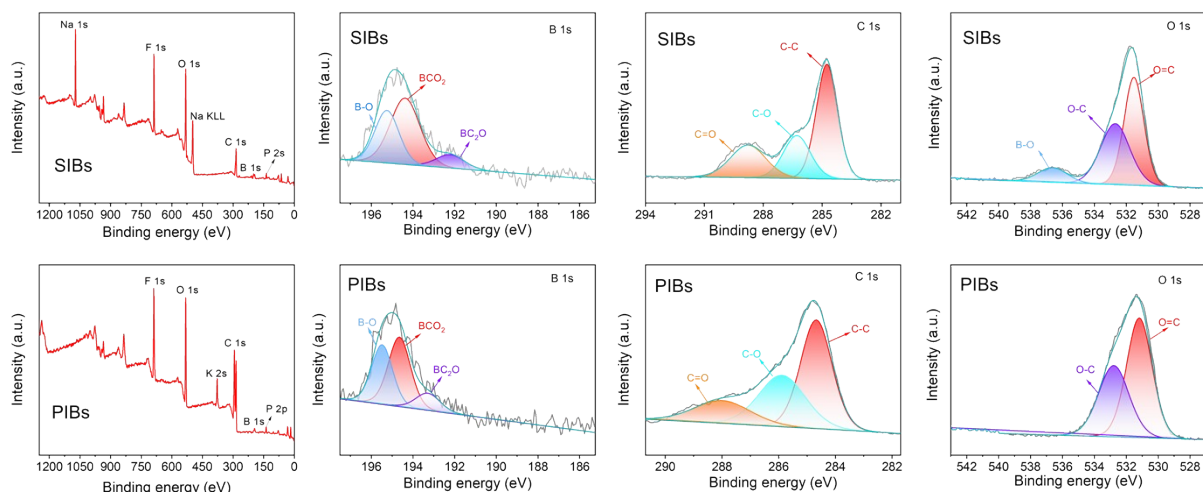

**Figure S8** XPS survey spectra and the high-resolution XPS spectra of the cycled BCNCs anode in SIBs and PIBs.

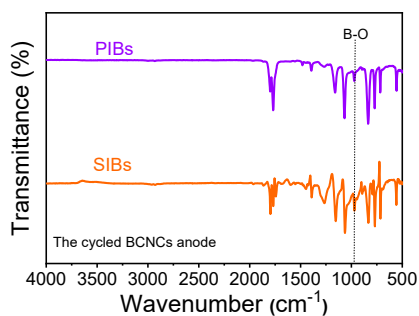

**Figure S9** FT-IR spectra of the cycled BCNCs anode in SIBs and PIBs.

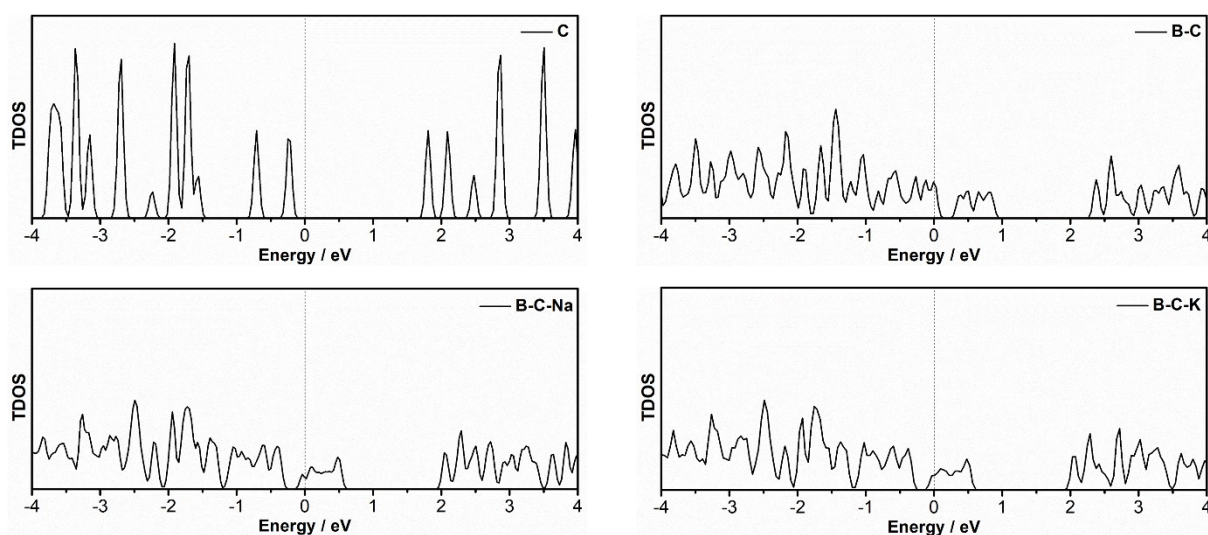

**Figure S10** Total density of states (TDOS) for (a) C; (c) B doped C; (e) Na/B doped C; (g) K/B doped C.

**Table S6** The comparison analysis of the carbon-based anodes for SIBs.

| Material/electrode                                                  | Cycling/rate performance (mAh g <sup>-1</sup> ) | Year [References] |
|---------------------------------------------------------------------|-------------------------------------------------|-------------------|
| Carbon-coated NiO/Ni composites (C-NiO/Ni)                          | 83 at 0.1 A g <sup>-1</sup> after 150 cycles    | 2021 [1]          |
| TiO <sub>2</sub> carbon nanofiber composite (TiO <sub>2</sub> /CNF) | 193 at 0.1 A g <sup>-1</sup> after 100 cycles   | 2021 [2]          |
| Na <sub>2</sub> CrO <sub>4</sub> /C nanocomposite (NCrO/C)          | 166 at 0.1 C after 100 cycles                   | 2021 [3]          |
| Carbon flakes (CF)                                                  | 131 at 0.1 A g <sup>-1</sup> after 100 cycles   | 2021 [4]          |
| NaFe(MoO <sub>4</sub> ) <sub>2</sub> microstructure (NFMO)          | 100 at 0.1 A g <sup>-1</sup> after 500 cycles   | 2021 [5]          |
| Sulfur-doped carbon (SDC)                                           | 118 at 50 mA g <sup>-1</sup> after 100 cycles   | 2021 [6]          |
| Hollow carbon microbox (HCMB)                                       | 140 at 0.5 A g <sup>-1</sup> after 500 cycles   | 2020 [7]          |
| Nitrogen-doped porous carbon (NDPC)                                 | 202 at 0.5 C after 100 cycles                   | 2020 [8]          |
| N-doped carbon hollow spheres (NDCHS)                               | 260 at 84 mA g <sup>-1</sup> after 300 cycles   | 2019 [9]          |
| Hard carbon spheres (HCS)                                           | 181 at 0.1 A g <sup>-1</sup> after 500 cycles   | 2020 [10]         |
| Hollow porous carbon spheres (HPCS)                                 | 104 at 0.5 A g <sup>-1</sup> after 10 cycles    | 2021 [11]         |
| hollow BC <sub>x</sub> O <sub>3-x</sub> nanocages (BCNCs)           | 176 at 0.1 A g <sup>-1</sup> after 1000 cycles  | This work         |

**Table S7** The comparison analysis of the carbon-based anodes for PIBs.

| Material/electrode                                        | Cycling/rate performance (mAh g <sup>-1</sup> ) | Year [References] |
|-----------------------------------------------------------|-------------------------------------------------|-------------------|
| Nitrogen-doped carbon microspheres (NCMSs)                | 95 at 0.5 A g <sup>-1</sup> after 400 cycles    | 2021 [12]         |
| Carbon nanofibers (CNFs)                                  | 214 at 100 mA g <sup>-1</sup> after 5 cycles    | 2018 [13]         |
| Microcrystalline graphite carbon (GC)                     | 172 at 0.1 A g <sup>-1</sup> after 200 cycles   | 2021 [14]         |
| Carbon supported tin sulfide (SbS/C)                      | 76 at 0.2 A g <sup>-1</sup> after 200 cycles    | 2021 [15]         |
| Nitrogen-doped carbon nanosheet (NCNS)                    | 253 at 50 mA g <sup>-1</sup> after 200 cycles   | 2021 [16]         |
| Porous nanoflake (PNF)                                    | 200 at 0.1 C after 20 cycles                    | 2020 [17]         |
| N-doped porous carbon (NDPC)                              | 256 at 50 mA g <sup>-1</sup> after 10 cycles    | 2020 [18]         |
| Hard carbon (HC)                                          | 232 at 0.1 C after 100 cycles                   | 2019 [19]         |
| 3D hierarchically porous carbon (3D-PC)                   | 276 at 50 mA g <sup>-1</sup> after 100 cycles   | 2018 [20]         |
| Activated carbon (AC)                                     | 209 at 0.1 A g <sup>-1</sup> after 10 cycles    | 2017 [21]         |
| CNT-modified graphited carbon (CNT-GC)                    | 56 at 2 A g <sup>-1</sup> after 10 cycles       | 2019 [22]         |
| hollow BC <sub>x</sub> O <sub>3-x</sub> nanocages (BCNCs) | 133 at 0.1 A g <sup>-1</sup> after 500 cycles   | This work         |

## References

- [1] C. Xu, Y. Li, R. A. Adams, V. G. Pol, Y. Xiao, A. Varma, P. Chen, *Journal of Alloys and Compounds* **2021**, 884.
- [2] Y. Li, R. Li, Y. Jin, W. Zhao, J. Chen, G. Chen, L. Qing, *Journal of Electroanalytical Chemistry* **2021**, 901.
- [3] G. Ali, M. Akbar, K. Y. Chung, *International Journal of Energy Research* **2021**, DOI: 10.1002/er.7295.
- [4] Y. Wang, K. Wang, B. Yong, L. Deng, P. Zhang, *Journal of Materials Research* **2021**, 36, 3460.
- [5] A. M. Tamboli, M. S. Tamboli, C. S. Praveen, P. Kumari Dwivedi, I. Karbhal, S. W. Gosavi, M. V. Shelke, B. B. Kale, *Applied Surface Science* **2021**, 559.
- [6] J. Wang, J. Bi, W. Wang, Z. Xing, M. Leng, L. Xie, *Journal of Solid State Electrochemistry* **2021**, 25, 2361.
- [7] T. Qiu, W. Hong, L. Li, Y. Zhang, P. Cai, C. Liu, J. Li, G. Zou, H. Hou, X. Ji, *Journal of Energy Chemistry* **2020**, 51, 293.
- [8] S. Chen, F. Feng, Z.-F. Ma, *Composites Communications* **2020**, 22.
- [9] B. Liu, J. Wang, J. Li, K. Fan, D. Zhao, G. Liu, C. Yang, H. Tong, D. Qian, *Journal of Physics and Chemistry of Solids* **2019**, 134, 214.
- [10] X. Zhang, X. Dong, X. Qiu, Y. Cao, C. Wang, Y. Wang, Y. Xia, *Journal of Power Sources* **2020**, 476.
- [11] T. Lyu, L. Liang, P. Kang Shen, *J Colloid Interface Sci* **2021**, 604, 168.
- [12] L. Li, L. Wang, C. Zhang, *Journal of Alloys and Compounds* **2022**, 893.
- [13] H. Li, Z. Cheng, Q. Zhang, A. Natan, Y. Yang, D. Cao, H. Zhu, *Nano Lett* **2018**, 18, 7407.
- [14] L. Yang, Y. Zhao, C. Ma, G. Han, *Journal of Materials Science: Materials in Electronics* **2021**, 32, 24446.
- [15] J. Liu, X. Yu, J. Bao, C.-F. Sun, Y. Li, *Journal of Physics and Chemistry of Solids* **2021**, 153.
- [16] S. Tian, Y. Zhang, C. Yang, S. Tie, J. Nan, *Electrochimica Acta* **2021**, 380.
- [17] J. Wen, L. Xu, J. Wang, Y. Xiong, J. Ma, C. Jiang, L. Cao, J. Li, M. Zeng, *Journal of Power Sources* **2020**, 474.
- [18] H. Wang, A. Artemova, G. Yang, H. Wang, L. Zhang, X. Cao, E. Arkhipova, J. Liu, Y. Huang, J. Lin, Z. Shen, *Journal of Power Sources* **2020**, 466.
- [19] C. Chen, M. Wu, Y. Wang, K. Zaghib, *Journal of Power Sources* **2019**, 444.
- [20] K. Huang, Z. Xing, L. Wang, X. Wu, W. Zhao, X. Qi, H. Wang, Z. Ju, *Journal of Materials Chemistry A* **2018**, 6, 434.
- [21] Z. Tai, Q. Zhang, Y. Liu, H. Liu, S. Dou, *Carbon* **2017**, 123, 54.
- [22] S. Zeng, X. Zhou, B. Wang, Y. Feng, R. Xu, H. Zhang, S. Peng, Y. Yu, *Journal of Materials Chemistry A* **2019**, 7, 15774.
